# Supplementary material for: Effects of Agronomic Practices on the Severity of Sweet Basil Downy Mildew (Peronospora belbahrii)
Source: MDPI journal article supplement (doi:10.3390/plants10050907), 2021-04-30
Supplement: s1 [file s1]

**Table S1.** Effect of tunnel orientation on the severity of sweet basil downy mildew (SBDM) in walk-in tunnels at Site 2.

| Experiment | Severity (%) <sup>b</sup>  |                          |             | Reduction (%) <sup>d</sup> of |                           |
|------------|----------------------------|--------------------------|-------------|-------------------------------|---------------------------|
|            | Time after planting (days) | East-West                | North-South | Severity values               | AUDPC values (in Table 1) |
| TD1        | 87                         | 40.0±3.56 a <sup>c</sup> | 35.6±2.12 a | -                             | 25.1                      |
| TD2        | 87                         | 50.6±7.45 a              | 34.8±3.5 b  | 31.2                          | 32.9                      |
| TD3        | 98                         | 95.0±7.42 a              | 11.3±3.24 b | 88.1                          |                           |
|            | 112                        | 98.0±1.42 a              | 80.0±2.26 b | 18.4                          | 63.2                      |

<sup>a</sup> Experiments were carried out with sweet basil plants grown in sand in walk-in tunnels during the Spring 2014 (Experiments TD1 and TD2) and Winter 2014–2015 (Experiment TD3) growing seasons. Beds were covered with transparent polyethylene (TD1 and TD3) or left uncovered (TD2).

<sup>b</sup> SBDM severity was evaluated on a 0–100% scale, in which 0 = healthy plants and 100% = plants completely covered by SBDM symptoms/signs.

<sup>c</sup> Averages ± SE. Values in each pair followed by a different letter are significantly different according to one-way ANOVA with Tukey's HSD. Default significance levels were set at  $\alpha = 0.05$ .

<sup>d</sup> Disease reduction (%) was calculated according to the following formula: % disease reduction =  $100 - 100 \times (\text{disease severity TT} / \text{disease severity control})$ .

**Table S2.** Effect of increased air circulation on the severity of sweet basil downy mildew (SBDM) in greenhouses at Site 1a.

| Experiment | Severity (%) <sup>b</sup>  |                          |             | Reduction (%) <sup>d</sup> of |                           |
|------------|----------------------------|--------------------------|-------------|-------------------------------|---------------------------|
|            | Time after planting (days) | Without fans             | With fans   | Severity values               | AUDPC values (in Table 2) |
| AC1        | 134                        | 11.8±2.40 a <sup>c</sup> | 7.3±2.00 b  | 38.1                          | 62.8                      |
| AC2        | 69                         | 2.3±0.45 a               | 1.0±0.48 b  | 56.5                          | 72.5                      |
| AC3        | 109                        | 35.4±3.57 a              | 11.2±3.26 b | 68.4                          | 36.6                      |
|            | 123                        | 32.7±4.21 a              | 16.9±4.52 b | 48.3                          |                           |

<sup>a</sup> Field experiments were carried out with sweet basil plants grown in detached growth medium covered by gray polyethylene at Site 1 during the Autumn 2013, Spring 2014 and Winter 2015 seasons (Experiments AC1, AC2 and AC3, respectively).

<sup>b</sup> SBDM severity was evaluated on a 0–100% scale, in which 0 = healthy plants and 100% = plants completely covered by SBDM symptoms/signs.

<sup>c</sup> Averages ± SE. Values in each pair followed by a different letter are significantly different according to one-way ANOVA with Tukey's HSD. Default significance levels were set at  $\alpha = 0.05$ .

<sup>d</sup> Disease reduction (%) was calculated according to the following formula: % disease reduction =  $100 - 100 \times (\text{disease severity TT} / \text{disease severity control})$ .

**Table S3.** Effect of polyethylene mulch on the severity of sweet basil downy mildew (SBDM) and yield of sweet basil in greenhouses at Site 1a.

| Experiment | Severity (%) <sup>b</sup>  |                          |              | Reduction (%) <sup>d</sup> of |                           | % yield increase (in Table 3) |
|------------|----------------------------|--------------------------|--------------|-------------------------------|---------------------------|-------------------------------|
|            | Time after planting (days) | No mulch                 | Polyethylene | Severity values               | AUDPC values (in Table 3) |                               |
| M2         | 114                        | 28.1±2.31 a <sup>c</sup> | 14.5±2.82 b  | 48.4                          | 51.0                      | 6.4                           |
| M4         | 93                         | 35.1±5.43 a              | 23.8±4.36 b  | 32.2                          | 13.8                      | 19.3                          |
| M5         | 80                         | 4.3±1.12a                | 1.5±0.68 b   | 65.1                          | 31.6                      | -                             |
|            | 93                         | 13.1±2.67a               | 9.6±3.19 a   | -                             |                           |                               |
| M6         | 123                        | 53.1±5.34a               | 26.4±8.79 b  | 50.3                          | 64.1                      | 42.3                          |
| M7         | 109                        | 50.0±2.95a               | 26.5±3.62 b  | 47.0                          | 47.4                      |                               |
|            | 123                        | 53.1±6.35a               | 26.4±7.55 b  | 50.3                          | 42.8                      | 79.2                          |

<sup>a</sup> Field experiments were carried out with sweet basil plants grown in detached growth medium at Site 1 during the Autumn 2013 (M2), Spring 2014 (M4–M6) and Winter 2015 (M7) growing seasons. Beds were covered with gray polyethylene (M2, M4 and M5) or transparent polyethylene (M6 and M7).

<sup>b</sup> SBDM severity was evaluated on a 0–100% scale, in which 0 = healthy plants and 100% = plants completely covered by SBDM symptoms/signs.

<sup>c</sup> Averages ± SE. Values in each pair followed by a different letter are significantly different according to one-way ANOVA with Tukey's HSD. Default significance levels were set at  $\alpha = 0.05$ .

<sup>d</sup> Disease reduction (%) was calculated according to the following formula: % disease reduction =  $100 - 100 \times (\text{disease severity TT} / \text{disease severity control})$ .

**Table S6.** Effects of polyethylene mulch on the severity of sweet basil downy mildew (SBDM) and yield of sweet basil in walk-in tunnels at Site 2a.

| Experiment | Time after planting (days) | Severity (%) <sup>b</sup> |              | Reduction (%) <sup>d</sup> of |                           | % yield increase (in Table 6) |
|------------|----------------------------|---------------------------|--------------|-------------------------------|---------------------------|-------------------------------|
|            |                            | No mulch                  | Polyethylene | Severity values               | AUDPC values (in Table 6) |                               |
| M8         | 87                         | 50.6±6.04 a <sup>c</sup>  | 24.5±4.03 b  | 51.6                          | 50.8                      | -                             |
| M9         | 114                        | 44.7±4.42 a               | 35.2±3.22 b  | 21.6                          | 40.2                      | 13.2                          |
| M10        | 114                        | 71.3±4.72 a               | 47.2±9.95 b  | 33.8                          | 21.4                      | 7.7                           |
| M11        | 98                         | 52.5±3.65 a               | 41.9±3.42 b  | 20.2                          | -                         |                               |
| M12        | 98                         | 71.9±6.24 a               | 55.6±5.4 b   | 22.7                          | 17.3                      |                               |
| M13        | 98                         | 27.0±8.59 a               | 15.7±2.71 b  | 41.9                          | 26.5                      |                               |
|            | 112                        | 83.9±9.45 a               | 72.9±4.64 a  | -                             |                           |                               |
| M14        | 98                         | 10.9±1.12 a               | 9.8±1.02 a   | -                             | 48.1                      |                               |

<sup>a</sup> Experiments were carried out with sweet basil plants grown in detached growth medium at Site 2 during the Spring 2014 (M8–M10) and Winter 2014–2015 (M11–M14) growing seasons. Mulch-treatment plots were covered with transparent polyethylene.

<sup>b</sup> SBDM severity was evaluated using a 0–100% scale, in which 0 = healthy plants and 100% = plants completely covered by SBDM symptoms/signs.

<sup>c</sup> Averages ± SE. Values in each pair followed by a different letter are significantly different according to one-way ANOVA with Tukey's HSD. Default significance levels were set at  $\alpha = 0.05$ .

<sup>d</sup> Disease reduction (%) was calculated according to the following formula: % disease reduction =  $100 - 100 \times (\text{disease severity TT} / \text{disease severity control})$ .

**Table S7.** Effect of planting density (PD) on the severity of sweet basil downy mildew (SBDM) in greenhouses at Site 1a.

| Experiment                                               | Time after planting (days) | Severity (%) <sup>b</sup> |             | Reduction (%) <sup>d</sup> of |                           | Yield (in Table 7) |
|----------------------------------------------------------|----------------------------|---------------------------|-------------|-------------------------------|---------------------------|--------------------|
|                                                          |                            | Dense (24)                | Sparse (14) | Severity values               | AUDPC values (in Table 7) |                    |
| PD1                                                      | 114                        | 50.6±6.22 a <sup>c</sup>  | 33.7±4.52 b | 33.4                          | 41.5                      |                    |
| PD2                                                      | 114                        | 7.9±1.53 a                | 2.5±0.71 b  | 68.4                          | 63.5                      | 12.8               |
| PD3                                                      | 134                        | 5.6±1.27 a                | 2.1±1.20 b  | 62.5                          | 62.2                      |                    |
| PD4                                                      | 80                         | 4.4±0.65 a                | 1.4±1.09 b  | 68.2                          | 22.1                      | 31.5               |
| PD5                                                      | 93                         | 35.1±5.43 a               | 23.8±4.49 b | 32.2                          | 33.9                      |                    |
| PD6                                                      | 151                        | 10.0±1.68 a               | 6.0±1.61 b  | 40.0                          | 37.5                      | 11.8               |
| PD7                                                      | 151                        | 22.9±2.25 a               | 14.7±1.14 b | 35.8                          | 33.6                      |                    |
| <b>Disease severity – Disease reduction <sup>e</sup></b> |                            |                           |             |                               |                           |                    |
| Equation                                                 |                            | $y = 200281x^{-2.51}$     |             |                               |                           |                    |
|                                                          | <i>r</i>                   | 0.9092                    |             |                               |                           |                    |
|                                                          | <i>n</i>                   | 7                         |             |                               |                           |                    |
|                                                          | <i>P</i>                   | <0.01                     |             |                               |                           |                    |

<sup>a</sup> Experiments were carried out with sweet basil plants grown in detached growth medium in greenhouses at Site 1 during the Autumn 2013 (Experiments PD1–PD3), Spring 2014 (Experiments PD4–PD6) and Winter 2015 (Experiment PD7) growing seasons. Beds were left bare (Experiments PD1, PD4 and PD6) or covered with polyethylene (Experiments PD2, PD3, PD5, and PD7).

<sup>b</sup> SBDM severity was evaluated using a 0–100% scale, in which 0 = healthy plants and 100% = plants completely covered by SBDM symptoms.

<sup>c</sup> Averages ± SE. Values in each pair followed by a different letter are significantly different according to one-way ANOVA with Tukey's HSD. Default significance levels were set at  $\alpha = 0.05$ .

<sup>d</sup> Disease reduction (%) was calculated according to the following formula: % disease reduction =  $100 - 100 \times (\text{disease severity TT} / \text{disease severity control})$ .

<sup>e</sup> Equations for the relation between disease severity values of dense PD and significant disease reduction values by the sparse PD are presented and the Pearson regression value (*r*) is presented along with the significance levels (*P*).

**Table S8.** Effect of planting density (PD) on the severity of sweet basil downy mildew (SBDM) in walk-in tunnels at Site 2a.

| Experiment                                               | SBDM severity (%) <sup>b</sup> |                          |             | Reduction (%) <sup>d</sup> of |                           |
|----------------------------------------------------------|--------------------------------|--------------------------|-------------|-------------------------------|---------------------------|
|                                                          | Time after planting (days)     | Dense (30)               | Sparse (15) | Severity values               | AUDPC values (in Table 8) |
| PD8                                                      | 87                             | 50.6±6.04 a <sup>c</sup> | 44.2±5.12 a | -                             | 50.8                      |
| PD9                                                      | 72                             | 27.0±3.94 a              | 16.5±4.23 b | 38.9                          | 23.6                      |
|                                                          | 114                            | 44.2±4.26 a              | 35.6±3.11 b | 19.5                          |                           |
|                                                          | 72                             | 18.4±3.42 a              | 10.7±2.42 b | 41.8                          | 21.7                      |
| PD10                                                     | 114                            | 63.7±5.93 a              | 54.7±4.75 a | -                             |                           |
|                                                          | 98                             | 16.0±5.24 a              | 7.6±2.41 b  | 52.5                          | 45.5                      |
| PD11                                                     | 98                             | 78.8±5.42 a              | 50.0±4.47 b | 36.5                          | 26.5                      |
| PD12                                                     | 98                             | 83.9±2.58 a              | 72.9±3.42 b | 13.1                          | 25.6                      |
| PD13                                                     | 112                            |                          |             |                               |                           |
| <b>Disease severity – Disease reduction <sup>e</sup></b> |                                |                          |             |                               |                           |
| Equation                                                 |                                | $y = 126.7e^{-0.037x}$   |             |                               |                           |
|                                                          | <i>r</i>                       | 0.7718                   |             |                               |                           |
|                                                          | <i>n</i>                       | 6                        |             |                               |                           |
|                                                          | <i>P</i>                       | <0.10                    |             |                               |                           |

<sup>a</sup> Experiments were carried out with sweet basil plants grown in sand in walk-in tunnels at Site 2 during the Spring 2014 (Experiments PD8–PD10) and Winter 2014–2015 (Experiments PD11–PD13) growing seasons. Beds were covered with polyethylene.

<sup>b</sup> SBDM severity was evaluated using a 0–100% scale, in which 0 = healthy plants and 100% = plants completely covered by SBDM symptoms/signs.

<sup>c</sup> Averages ± SE. Values in each pair followed by a different letter are significantly different according to one-way ANOVA with Tukey's HSD. Default significance levels were set at  $\alpha = 0.05$ .

<sup>d</sup> Disease reduction (%) was calculated according to the following formula: % disease reduction =  $100 - 100 \times (\text{disease severity TT} / \text{disease severity control})$ .

<sup>e</sup> Equations for the relation between disease severity values of dense PD and significant disease reduction values by the sparse PD are presented. Pearson regression value (*r*) is presented along with the significance levels (*P*).
